# Supplementary material for: Inflammatory marker trajectories associated with frailty and ageing in a 20‐year longitudinal study
Source: PubMed Central journal article supplement — Clin Transl Immunology. 2022 Feb 9;11(2):e1374. doi: 10.1002/cti2.1374 (PMC8826353; doi:10.1002/cti2.1374), 2022-02-09
Supplement: CTI2-11-e1374-s001.pdf [file CTI2-11-e1374-s001.pdf]

# Inflammatory marker trajectories associated with frailty and aging in a 20-year longitudinal study

Leonard Daniël Samson<sup>1,2</sup>, Anne-Marie Buisman<sup>1</sup>, José A. Ferreira<sup>1</sup>, H. Susan J. Picavet<sup>1</sup>, W. M. Monique Verschuren<sup>1,3</sup>, A. Mieke H. Boots<sup>2</sup>, Peter Engelfriet<sup>1</sup>

---

<sup>1</sup>: *National Institute of Public Health and the Environment, Bilthoven, The Netherlands*

<sup>2</sup>: *Department of Rheumatology and Clinical Immunology, University of Groningen, University Medical Center Groningen, The Netherlands*

<sup>3</sup>: *Julius Center for Health Sciences and Primary Care, University Medical Center Utrecht, Utrecht University, Utrecht, The Netherlands*

Supplementary table 1: Summary characteristics of the cytokines and chemokines in the cohort

| Protein                   | Baseline concentration               | Endpoint concentration              | AUC                                 |
|---------------------------|--------------------------------------|-------------------------------------|-------------------------------------|
| <b>C-reactive protein</b> |                                      |                                     |                                     |
| CRP                       | 1.04(0.85 – 1.27) * 10 <sup>6</sup>  | 1.28(1.08 – 1.51) * 10 <sup>6</sup> | 1.56(1.32 – 1.85) * 10 <sup>6</sup> |
| <b>CC chemokines</b>      |                                      |                                     |                                     |
| CCL1/I-309                | 33.20(30.54 – 36.09)                 | 33.96(31.47 – 36.65)                | 34.07(31.67 – 36.65)                |
| CCL2/MCP-1                | 1.02(0.96 – 1.09) * 10 <sup>2</sup>  | 1.10(1.03 – 1.17) * 10 <sup>2</sup> | 1.08(1.03 – 1.14) * 10 <sup>2</sup> |
| CCL5/RANTES               | 8.76(7.91 – 9.71) * 10 <sup>4</sup>  | 7.69(7.03 – 8.41) * 10 <sup>4</sup> | 7.97(7.40 – 8.58) * 10 <sup>4</sup> |
| CCL11/Eotaxin             | 47.59(44.88 – 50.47)                 | 53.22(50.26 – 56.35)                | 50.73(48.38 – 53.19)                |
| CCL27/C-TACK              | 9.44(8.63 – 10.33) * 10 <sup>2</sup> | 1.18(1.07 – 1.29) * 10 <sup>3</sup> | 1.09(1.01 – 1.17) * 10 <sup>3</sup> |
| <b>CXC chemokines</b>     |                                      |                                     |                                     |
| CXCL9/MIG                 | 30.68(27.84 – 33.81)                 | 31.58(28.85 – 34.57)                | 31.50(29.31 – 33.85)                |
| CXCL10/IP-10              | 2.38(2.20 – 2.57) * 10 <sup>2</sup>  | 3.35(3.11 – 3.61) * 10 <sup>2</sup> | 3.00(2.81 – 3.21) * 10 <sup>2</sup> |
| CXCL11/I-TAC              | 59.49(50.64 – 69.89)                 | 72.40(63.00 – 83.20)                | 69.44(61.38 – 78.56)                |
| <b>Interleukins</b>       |                                      |                                     |                                     |
| IL-6                      | 24.43(20.35 – 29.33)                 | 24.58(20.53 – 29.43)                | 26.30(22.95 – 30.14)                |
| IL-10                     | 7.17(6.11 – 8.41)                    | 6.87(5.73 – 8.22)                   | 7.59(6.72 – 8.57)                   |
| <b>Soluble receptors</b>  |                                      |                                     |                                     |
| sCD14                     | 2.16(2.04 – 2.28) * 10 <sup>6</sup>  | 2.19(2.07 – 2.32) * 10 <sup>6</sup> | 2.26(2.15 – 2.37) * 10 <sup>6</sup> |
| sCD40L                    | 4.06(3.55 – 4.65) * 10 <sup>2</sup>  | 3.66(3.21 – 4.18) * 10 <sup>2</sup> | 4.02(3.63 – 4.45) * 10 <sup>2</sup> |
| sIL-6R                    | 2.29(2.18 – 2.40) * 10 <sup>4</sup>  | 2.41(2.29 – 2.54) * 10 <sup>4</sup> | 2.38(2.28 – 2.49) * 10 <sup>4</sup> |
| <b>Other</b>              |                                      |                                     |                                     |
| P selectin                | 7.77(6.71 – 8.99) * 10 <sup>4</sup>  | 6.83(6.06 – 7.70) * 10 <sup>4</sup> | 8.00(7.34 – 8.72) * 10 <sup>4</sup> |
| sGP130                    | 2.19(2.12 – 2.26) * 10 <sup>4</sup>  | 2.24(2.17 – 2.30) * 10 <sup>4</sup> | 2.24(2.19 – 2.30) * 10 <sup>4</sup> |
| C5a                       | 4.68(4.11 – 5.32) * 10 <sup>3</sup>  | 4.99(4.41 – 5.65) * 10 <sup>3</sup> | 5.09(4.52 – 5.72) * 10 <sup>3</sup> |
| BDNF                      | 1.83(1.70 – 1.97) * 10 <sup>4</sup>  | 1.68(1.53 – 1.84) * 10 <sup>4</sup> | 1.73(1.61 – 1.87) * 10 <sup>4</sup> |

*Note:*

Concentrations ( $pg * mL^{-1}$ ) and AUC values ( $years * pg * mL^{-1}$ ) are geometric mean values with 95% confidence intervals.

Supplementary table 2: Association of inflammatory markers with change in frailty index score in men and women

| Sex   | Marker        | Comparison with                | n  | P value | $\rho$ | FDR  | Selected |
|-------|---------------|--------------------------------|----|---------|--------|------|----------|
| Men   | CRP           | Change in FI (last two rounds) | 52 | 0.03    | 0.43   | 0.47 | –        |
| Men   | CCL27/C-TACK  | Change in FI (last two rounds) | 52 | 0.07    | 0.13   | 0.63 | –        |
| Men   | P selectin    | Change in FI (last two rounds) | 52 | 0.11    | -0.22  | 0.64 | –        |
| Men   | IL-6          | Change in FI (last two rounds) | 47 | 0.28    | -0.04  | 1.24 | –        |
| Men   | CXCL11/I-TAC  | Change in FI (last two rounds) | 52 | 0.45    | -0.07  | 1.63 | –        |
| Men   | sCD14         | Change in FI (last two rounds) | 52 | 0.45    | 0.10   | 1.36 | –        |
| Men   | C5a           | Change in FI (last two rounds) | 52 | 0.47    | 0.12   | 1.22 | –        |
| Men   | CCL11/Eotaxin | Change in FI (last two rounds) | 52 | 0.48    | 0.15   | 1.09 | –        |
| Men   | CXCL9/MIG     | Change in FI (last two rounds) | 52 | 0.49    | 0.05   | 0.98 | –        |
| Men   | sGP130        | Change in FI (last two rounds) | 47 | 0.60    | -0.13  | 1.09 | –        |
| Men   | CXCL10/IP-10  | Change in FI (last two rounds) | 52 | 0.64    | -0.04  | 1.05 | –        |
| Men   | IL-10         | Change in FI (last two rounds) | 47 | 0.70    | -0.02  | 1.05 | –        |
| Men   | CCL1/I-309    | Change in FI (last two rounds) | 52 | 0.77    | 0.10   | 1.07 | –        |
| Men   | CCL5/RANTES   | Change in FI (last two rounds) | 52 | 0.82    | 0.09   | 1.06 | –        |
| Men   | sCD40L        | Change in FI (last two rounds) | 52 | 0.87    | -0.02  | 1.04 | –        |
| Men   | sIL-6R        | Change in FI (last two rounds) | 52 | 0.89    | -0.01  | 1.00 | –        |
| Men   | BDNF          | Change in FI (last two rounds) | 52 | 0.95    | 0.01   | 1.00 | –        |
| Men   | CCL2/MCP-1    | Change in FI (last two rounds) | 52 | 0.99    | 0.13   | 0.99 | –        |
| Women | sCD40L        | Change in FI (last two rounds) | 58 | 0.02    | -0.25  | 0.32 | –        |
| Women | sCD14         | Change in FI (last two rounds) | 58 | 0.05    | 0.31   | 0.41 | –        |
| Women | IL-10         | Change in FI (last two rounds) | 52 | 0.06    | -0.36  | 0.38 | –        |
| Women | IL-6          | Change in FI (last two rounds) | 52 | 0.06    | -0.37  | 0.29 | –        |
| Women | CRP           | Change in FI (last two rounds) | 58 | 0.09    | 0.18   | 0.33 | –        |
| Women | P selectin    | Change in FI (last two rounds) | 58 | 0.18    | -0.14  | 0.54 | –        |
| Women | CCL5/RANTES   | Change in FI (last two rounds) | 58 | 0.18    | -0.20  | 0.47 | –        |
| Women | CCL11/Eotaxin | Change in FI (last two rounds) | 58 | 0.19    | -0.16  | 0.42 | –        |
| Women | BDNF          | Change in FI (last two rounds) | 58 | 0.27    | -0.23  | 0.54 | –        |
| Women | CXCL9/MIG     | Change in FI (last two rounds) | 58 | 0.33    | -0.21  | 0.59 | –        |
| Women | sIL-6R        | Change in FI (last two rounds) | 58 | 0.36    | 0.06   | 0.59 | –        |
| Women | CXCL11/I-TAC  | Change in FI (last two rounds) | 58 | 0.37    | -0.14  | 0.55 | –        |
| Women | C5a           | Change in FI (last two rounds) | 58 | 0.47    | 0.16   | 0.66 | –        |
| Women | CCL1/I-309    | Change in FI (last two rounds) | 58 | 0.70    | -0.17  | 0.90 | –        |
| Women | CCL2/MCP-1    | Change in FI (last two rounds) | 58 | 0.79    | -0.01  | 0.95 | –        |
| Women | CXCL10/IP-10  | Change in FI (last two rounds) | 58 | 0.80    | 0.04   | 0.90 | –        |
| Women | sGP130        | Change in FI (last two rounds) | 53 | 0.90    | 0.04   | 0.95 | –        |
| Women | CCL27/C-TACK  | Change in FI (last two rounds) | 58 | 1.00    | 0.00   | 1.00 | –        |

*Note:*

Permutation version of the Spearman test was used. Tests are stratified by the tertile of the initial frailty index (FI) scores and by age. FDR: (estimated) False Discovery Rate. Selected: condition selected based on FDR <0.15

Supplementary table 3: Frailty index components

| No | Frailty index component | Description                                                                                                                                                                                                             | Value: 0                | Value: 0.5 | Value: 1                |
|----|-------------------------|-------------------------------------------------------------------------------------------------------------------------------------------------------------------------------------------------------------------------|-------------------------|------------|-------------------------|
| 1  | RR                      | High (systolic) blood pressure                                                                                                                                                                                          | $RR < 160$              |            | $RR \geq 160$           |
| 2  | Cardiologic Disease     | One or more of the following conditions: myocardial infarction, bypass-surgery, balloon dilatation, cardiac catheterization, pacemaker implantation, large blood vessel surgery, hospitalization due to cardiac failure | No                      |            | One or more prevalent   |
| 3  | Diabetes                | Prevalence of Diabetes                                                                                                                                                                                                  | No                      |            | Yes                     |
| 4  | Hearing                 | Inability to maintain a conversation in a group of 3 or more people due to hearing impairment (with hearing aid if needed)                                                                                              | Yes or with some effort |            | No or with great effort |
| 5  | Malignancy              | (History of) any form of malignancy                                                                                                                                                                                     | No                      |            | Yes                     |
| 6  | Joint Inflammation      | Chronic joint inflammation in the past year                                                                                                                                                                             | No                      |            | Yes                     |
| 7  | Osteoporosis            | Osteoporosis diagnosed by a medical doctor, in the past year,                                                                                                                                                           | No                      |            | Yes                     |
| 8  | Lower Back Pain         | Severe lower back complaints in the past year (including lumbar herniated nucleus pulposus)                                                                                                                             | No                      |            | Yes                     |
| 9  | CVA                     | (History of) stroke                                                                                                                                                                                                     | No                      |            | Yes                     |
| 10 | Migraine                | Migraine prevalence in the past year                                                                                                                                                                                    | No                      |            | Yes                     |

Supplementary table 3: Frailty index components (*continued*)

| No | Frailty index component | Description                                                                                                                                 | Value: 0          | Value: 0.5       | Value: 1             |
|----|-------------------------|---------------------------------------------------------------------------------------------------------------------------------------------|-------------------|------------------|----------------------|
| 11 | Neurologic Disease      | One or more of the following neurological diseases, diagnosed by a medical doctor: m. Parkinson, Multiple Sclerosis, epilepsy               | No                |                  | Yes                  |
| 12 | Asthma                  | Asthma diagnosed by a doctor and one or more asthma attacks in the past year                                                                | No                |                  | Yes                  |
| 13 | Spirometry Ratio        | Poor lung function quantified by spirometry measurements: first second of forced expiration divided by the forced vital capacity (FEV1/FVC) | $FEV1/FVC > 0.70$ |                  | $FEV1/FVC \leq 0.70$ |
| 14 | Digestive Tract         | Severe bowel disorders in the past year, diagnosed by a medical doctor                                                                      | No                |                  | Yes                  |
| 15 | Vertigo                 | Vertigo with falling the past 12 months                                                                                                     | No vertigo        | Some ver-tigo    | Severe vertigo       |
| 16 | Pain                    | Limited in daily activities due to pain                                                                                                     | No limitation     | Some limi-tation | Severe limitation    |
| 17 | Incontinence            | Unintentional urine incontinence past 12 months                                                                                             | No                |                  | Yes                  |
| 18 | Ankle Brachial Index    | Poor ankle brachial index (ABI, the ratio of the systolic blood pressure in the ankle to the blood pressure in the arm)                     | $ABI > 0.9$       |                  | $ABI \leq 0.9$       |

Supplementary table 3: Frailty index components (*continued*)

| No | Frailty index component | Description                                                                                                                                                                                                                         | Value: 0                                                                           | Value: 0.5 | Value: 1                                                                       |
|----|-------------------------|-------------------------------------------------------------------------------------------------------------------------------------------------------------------------------------------------------------------------------------|------------------------------------------------------------------------------------|------------|--------------------------------------------------------------------------------|
| 19 | Health Perception       | (Subjective) perception of poor health                                                                                                                                                                                              | No or some impairment                                                              |            | Severe impairment                                                              |
| 20 | Eyesight                | Bad eyesight perception, facial recognition within 4 meters (with glasses/ contact lenses if needed)                                                                                                                                | No                                                                                 |            | Yes                                                                            |
| 21 | Renal Function          | Poor renal function (estimated Glomerular Filtration Rate (eGFR), calculated with plasma creatinine concentrations) (Inker et al., 2012)                                                                                            | $eGFR \geq 60$                                                                     |            | $eGFR < 60$                                                                    |
| 22 | Cognitive Speed         | Poor cognitive speed. Z-scores corrected for measurements per person and for education level. Scores derived from the Stroop Color-Word Test and the Letter-Digit Substitution Test, as described previously (Nooyens et al., 2011) | Not belonging to 10% participants with lowest z-score within the Doetinchem cohort |            | Belonging to 10% participants with lowest z-score within the Doetinchem cohort |
| 23 | Cognitive Memory        | Poor cognitive memory. Z-scores corrected for measurements per person and for education level. Scores derived from the Verbal Learning Test, as described previously (Nooyens et al., 2011)                                         | Not belonging to 10% participants with lowest z-score within the Doetinchem cohort |            | Belonging to 10% participants with lowest z-score within the Doetinchem cohort |

Supplementary table 3: Frailty index components (*continued*)

| No | Frailty index component | Description                                                                                                                                                                                                                       | Value: 0                                                                           | Value: 0.5      | Value: 1                                                                       |
|----|-------------------------|-----------------------------------------------------------------------------------------------------------------------------------------------------------------------------------------------------------------------------------|------------------------------------------------------------------------------------|-----------------|--------------------------------------------------------------------------------|
| 24 | Cognitive Flexibility   | Poor cognitive flexibility. Z-scores corrected for measurements per person and education level. Scores derived from the Stroop Color-Word Test, as described previously (Nooyens et al., 2011)                                    | Not belonging to 10% participants with lowest z-score within the Doetinchem cohort |                 | Belonging to 10% participants with lowest z-score within the Doetinchem cohort |
| 25 | Physical Inactive       | Not meeting the Dutch healthy exercise norm.(Kemper, 2000). In addition: belonging to the 25th lowest percentile of walking activity and the 10th percentile lowest low/medium/high intensive activities in the Doetinchem cohort | No                                                                                 |                 | Yes                                                                            |
| 26 | ADL                     | Limited in washing and dressing due to health                                                                                                                                                                                     | No limitation                                                                      | Some limitation | Severe limitation                                                              |
| 27 | Household               | Limited in daily activities (cooking, cleaning) due to health                                                                                                                                                                     | No limitatlion                                                                     | Some limitation | Severe limitation                                                              |
| 28 | Walking                 | Limited in in walking 100 meters                                                                                                                                                                                                  | No limitatlion                                                                     | Some limitation | Severe limitation                                                              |
| 29 | Lifting                 | Limited in lifting or carrying groceries due to health                                                                                                                                                                            | No limitatlion                                                                     | Some limitation | Severe limitation                                                              |

Supplementary table 3: Frailty index components (*continued*)

| No | Frailty index component | Description                                                                     | Value: 0       | Value: 0.5           | Value: 1             |
|----|-------------------------|---------------------------------------------------------------------------------|----------------|----------------------|----------------------|
| 30 | Walking Stairs          | Limited in climbing stairs                                                      | No limitatlion | Some limi-<br>tation | Severe<br>limitation |
| 31 | Grip Strength           | Poor grip strength (cutoff points as described previously) (Fried et al., 2001) |                |                      |                      |
|    |                         | <i>Men, BMI</i> $\leq 24$                                                       | $> 29$         |                      | $\leq 29$            |
|    |                         | <i>Men, 24 &lt; BMI</i> $\leq 26$                                               | $> 30$         |                      | $\leq 30$            |
|    |                         | <i>Men, 26 &lt; BMI</i> $\leq 28$                                               | $> 30$         |                      | $\leq 30$            |
|    |                         | <i>Men, BMI</i> $> 28$                                                          | $> 32$         |                      | $\leq 32$            |
|    |                         | <i>Women, BMI</i> $\leq 24$                                                     | $> 17$         |                      | $\leq 17$            |
|    |                         | <i>Women, 23 &lt; BMI</i> $\leq 26$                                             | $> 17.3$       |                      | $\leq 17.3$          |
|    |                         | <i>Women, 26 &lt; BMI</i> $\leq 29$                                             | $> 18$         |                      | $\leq 18$            |
|    |                         | <i>Women, BMI</i> $> 29$                                                        | $> 21$         |                      | $\leq 21$            |
| 32 | Depressed               | Feeling depressed the past week                                                 | No limitatlion | Some limi-<br>tation | Severe<br>limitation |
| 33 | Happiness               | Feeling unhappy the past 4 weeks                                                | No limitatlion | Some limi-<br>tation | Severe<br>limitation |
| 34 | Mental Effort           | Feeling as if every activity costs effort during the past week                  | No limitatlion | Some limi-<br>tation | Severe<br>limitation |
| 35 | Getting Going           | Not being able to get going the past week                                       | No limitatlion | Some limi-<br>tation | Severe<br>limitation |



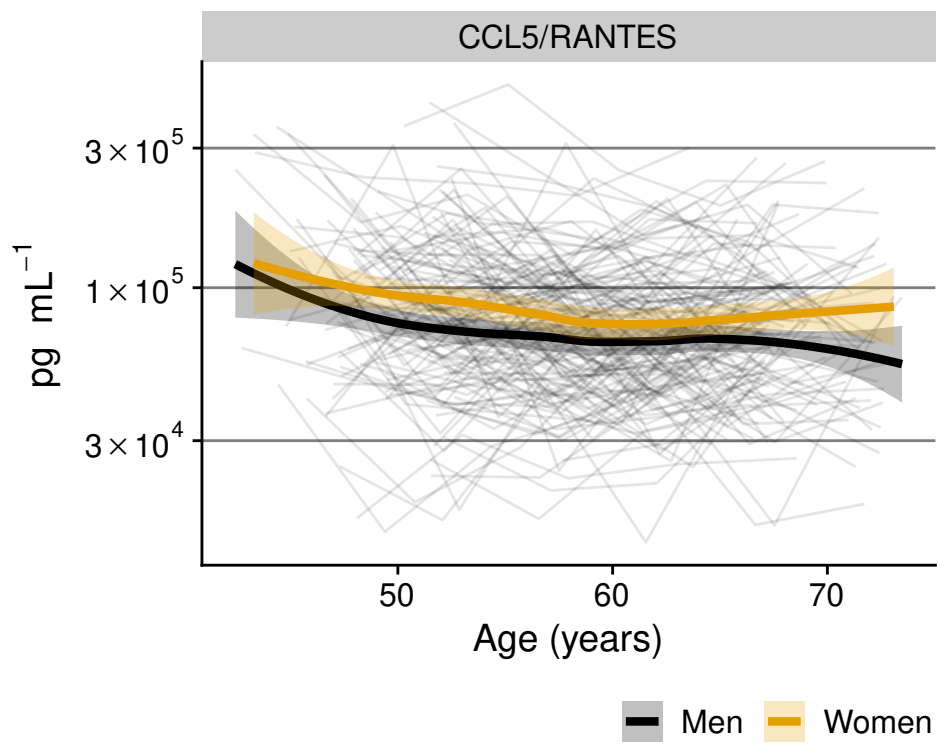

Supplementary figure 1: The concentration of CCL5/RANTES over 20 years in men and women (showing that this is continuously higher in women).

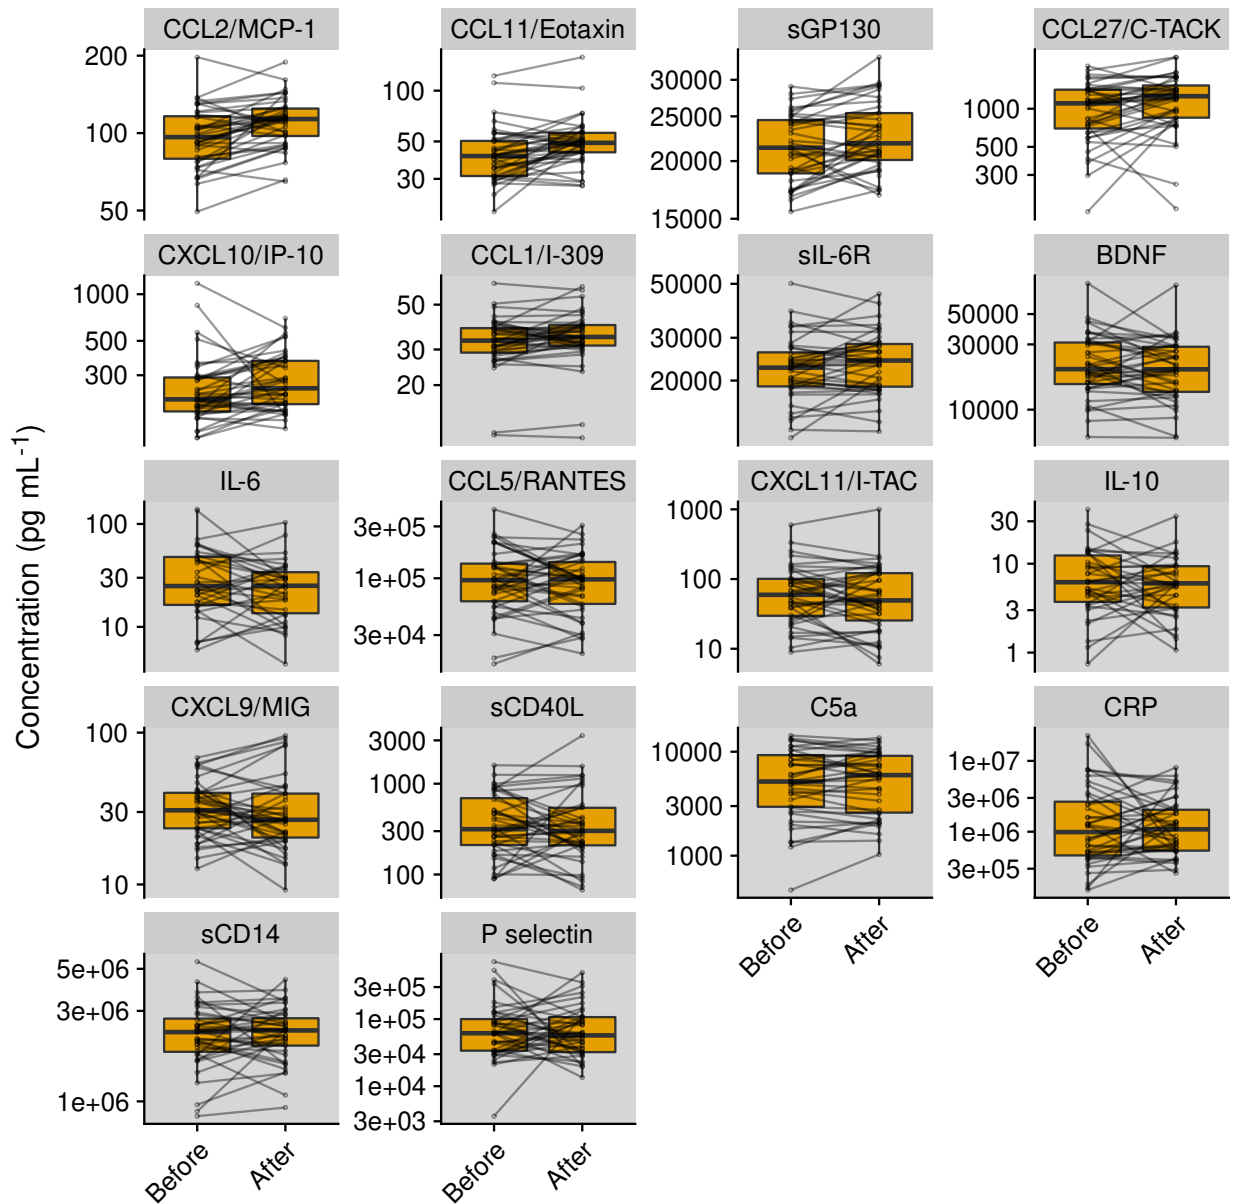

Supplementary figure 2: Menopause is related to changes in inflammatory marker profile. Inflammatory marker concentrations are shown shortly before and shortly after menopause (average difference: 5.3 years) in women of whom data at both timepoints are available (n=40/70). Tiles of biomarkers in which an association was found with menopause are shown in a white background, others in a grey background.

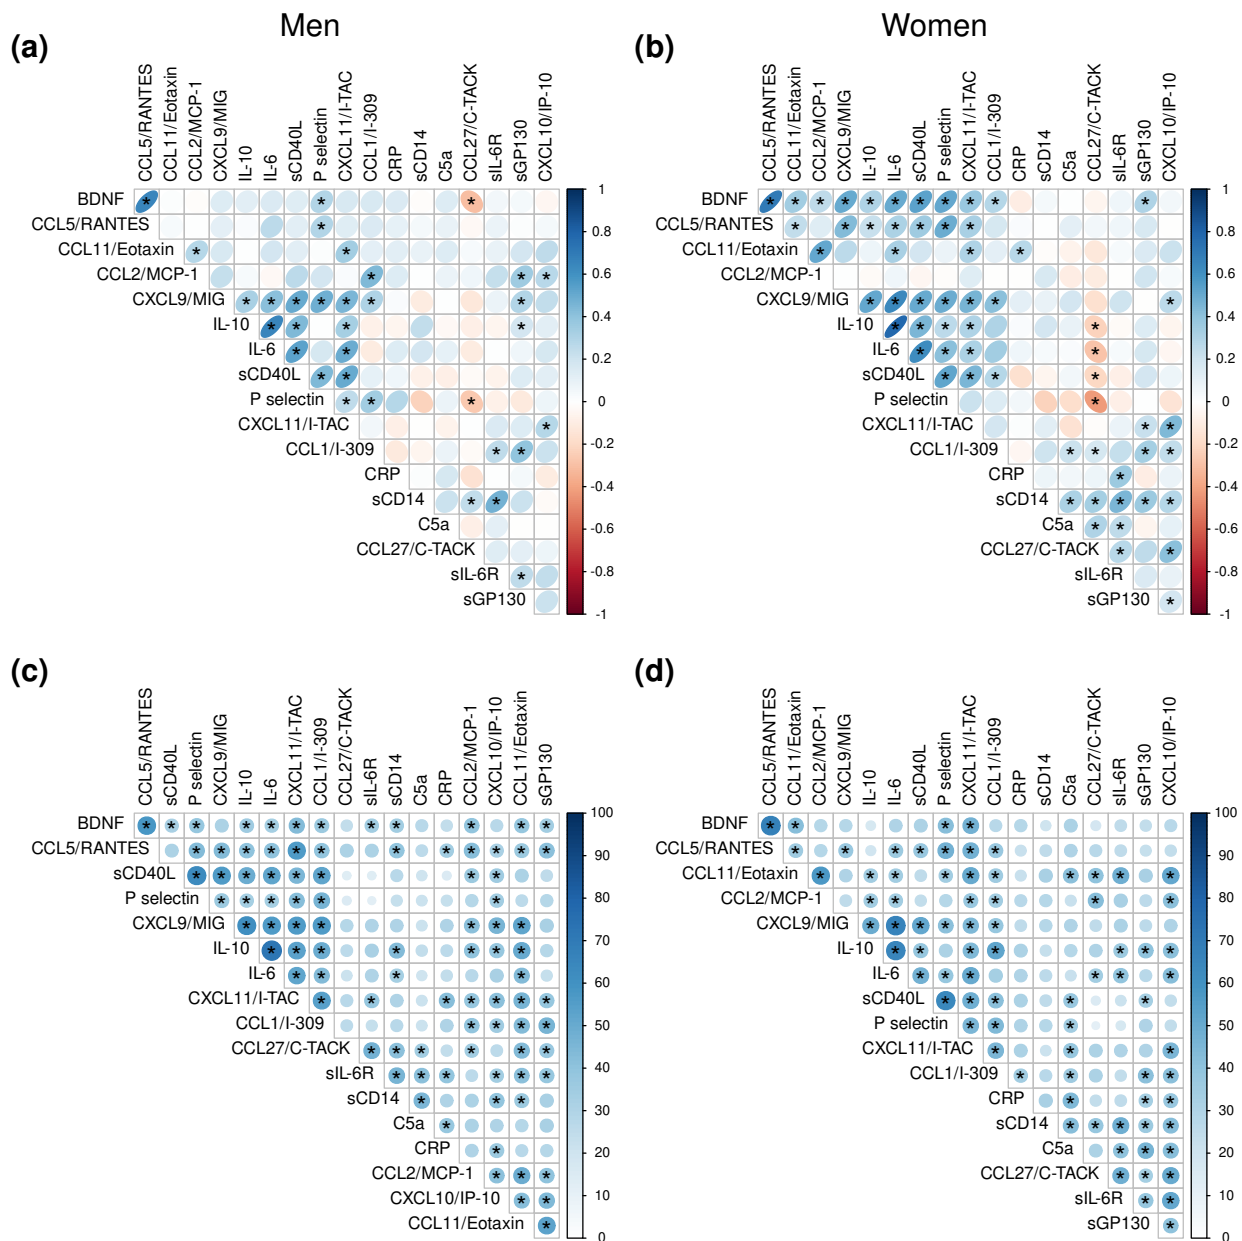

Supplementary figure 3: Relationships between inflammatory markers shown as ((a), (b)) correlation between pairs of inflammatory markers at study endpoint and ((c), (d)) similarity between pairs of inflammatory marker trajectories during about 20years of follow-up. In (a) and (b) the direction and strength of the association is visualized with an oval shape and a color gradient. In (c) and (d) the blue gradient color and the size of the circles shows the percentage of participants of which a pair of biomarkers had the highest increase in concentration at the same moment in 20 years of follow-up. \*= an association between two inflammatory markers, with false discovery rate being set at a maximum of 15%. n=71 women, n=73 men.

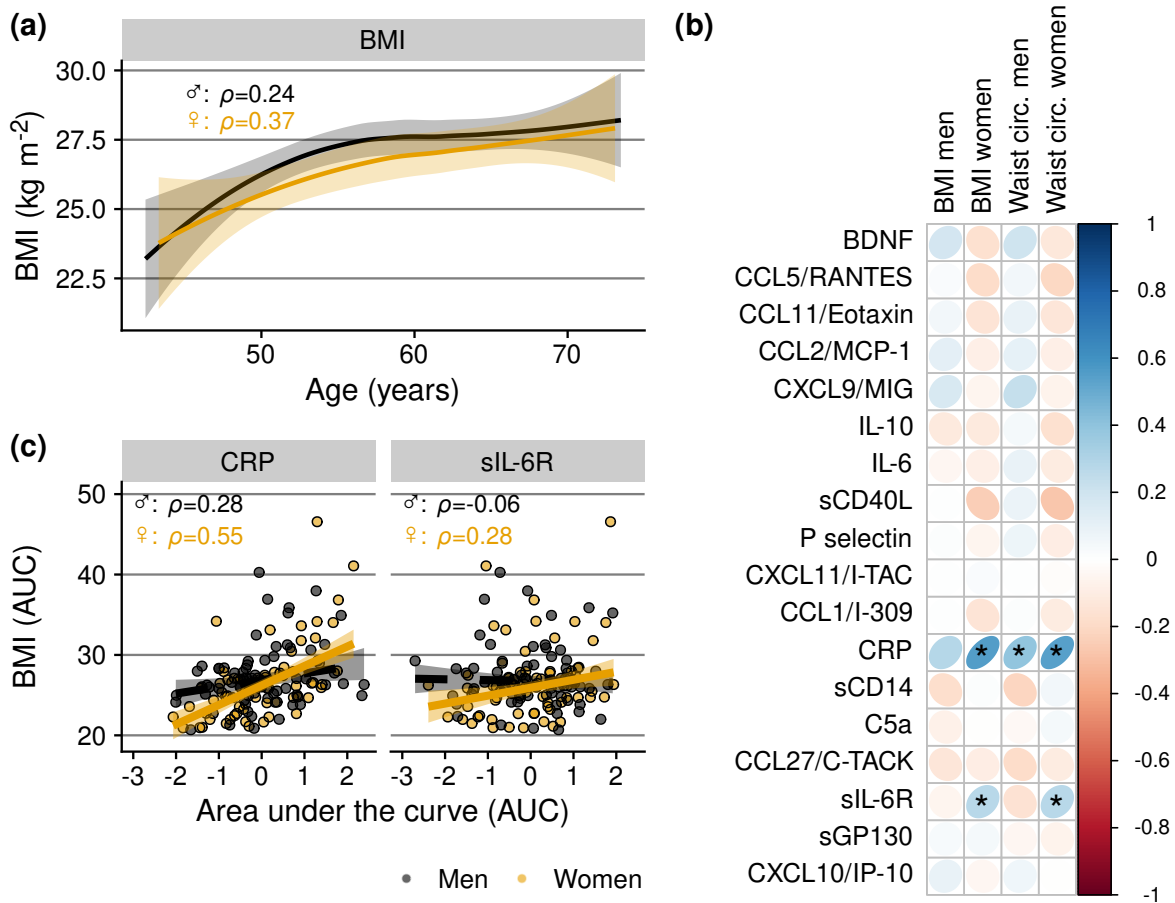

Supplementary figure 4: Relationship between body mass and inflammatory markers. **(a)** Local polynomial regression lines showing change in BMI over time in men and women. **(b)** Relationship of inflammatory marker levels with BMI and waist circumference of men (n=73) and women (n=71). Direction and strength of the associations in **(b)** are visualized with an oval shape and a color gradient. To capture the cumulative “exposure”, both BMI and inflammatory markers in **(b)** and **(c)** are expressed as area under the curve of levels/concentrations versus time, standardized to take into account different follow-up periods, and transformed into z-values. **(c)** BMI values (AUC) related to the AUC of CRP and sIL-6R. Trendlines in **(c)** are (robust) linear regression lines with 95% confidence interval.
